# Supplementary material for: Periosteal Flaps Enhance Prefabricated Engineered Bone Reparative Potential
Source: PubMed Central journal article supplement (PMC8808084; doi:10.1177/00220345211037247), 2021-09-11
Supplement: sj-pdf-1-jdr-10.1177_00220345211037247.pdf [file sj-pdf-1-jdr-10.1177_00220345211037247.pdf]

# Supplementary Appendix

## **Periosteal flaps enhance prefabricated engineered bone reparative potential**

Ahmed Abu-Shahba <sup>1,2</sup>, Tommy Wilkman <sup>3</sup>, Roman Kornilov <sup>1</sup>, Magdy Adam <sup>4</sup>, Kati Maria Salla <sup>4</sup>, Jere Lindén <sup>5,6</sup>, Anu Lappalainen<sup>4</sup>, Roy Björkstrand <sup>7</sup>, Riitta Seppänen-Kajansinkko <sup>1,3</sup>, Bettina Mannerström <sup>1</sup>

<sup>1</sup> Department of Oral and Maxillofacial Diseases, University of Helsinki and Helsinki University Hospital, Helsinki, Finland

<sup>2</sup> Department of Oral and Maxillofacial Surgery, Faculty of Dentistry, Tanta University, Tanta, Egypt

<sup>3</sup> Department of Oral and Maxillofacial Surgery, Helsinki University Hospital, Helsinki, Finland

<sup>4</sup> Department of Equine and Small Animal Medicine, Faculty of Veterinary Medicine, University of Helsinki, Helsinki, Finland

<sup>5</sup> Department of Veterinary Biosciences, Faculty of Veterinary Medicine, University of Helsinki, Helsinki, Finland

<sup>6</sup> Finnish Centre for Laboratory Animal Pathology (FCLAP), HiLIFE, University of Helsinki, Helsinki, Finland

<sup>7</sup> Department of Mechanical Engineering, Aalto University, Finland

## **1 General anesthesia (GA) and perioperative management protocol**

### **1.1 First stage surgery (prefabrication in IVBs phase)**

Sheep were premedicated with intramuscular xylazine (0.2 mg/kg) and ketamine (1 mg/kg) or acepromazine (0.03 mg/kg), midazolam (0.3 mg/kg) and butorphanol (0.2 mg/kg). GA was induced with intravenous ketamine (2 mg/kg) and propofol (2 mg/kg) followed by endotracheal intubation. During the surgical procedure, sheep were kept on left lateral recumbency and anesthesia was maintained with sevoflurane in oxygen (ETsevo 2.3%). Intermittent positive pressure ventilation was provided as needed to target of end-tidal CO<sub>2</sub> (ETCO<sub>2</sub>) 35 - 45 mmHg. During the anesthesia, standard clinical and instrumental monitoring were carried out. Prior to incision, local anesthesia with lidocaine cum adrenaline (maximum 4 mg/kg of lidocaine) was applied. During the surgery, rescue analgesia (fentanyl 3 µg/kg IV) was given if needed. Perioperative fluid therapy with Lactated Ringer (5-10 ml/kg/h) was infused throughout the anesthesia. Prophylactic antibiotic therapy (ampicillin 22mg/kg IV) was administered 30 minutes prior to incision and every 90-minute interval until the end of surgery.

After the surgery sheep were returned to the group pen, when they recovered from anesthesia and had normal locomotor activity. Post-operative analgesia consisted of repeated intramuscular buprenorphine (0.006-0.008 mg/kg) and fentanyl patch (2 µg/kg) applied to the antebrachium according to the experimental animal license.

### **1.2 Pre-reconstructive CT scanning (1<sup>st</sup> CT) and reconstructive surgery (2<sup>nd</sup> surgery)**

After the premedication with intramuscular butorphanol (0.3 mg/kg) and midazolam (0.3 mg/kg), anesthesia was induced with intravenous ketamine (2 mg/kg) and propofol (2 mg/kg) followed by endotracheal intubation. During the CT scanning and mandibular surgery, GA was maintained with the same protocol as previously detailed in 1<sup>st</sup> surgery. The intraoperative analgesia, perioperative fluid therapy, prophylactic antibiotic, and post-operative analgesia were performed in the 1<sup>st</sup> surgery protocol.

### **1.3 Follow up post-reconstructive CT scanning (2<sup>nd</sup> CT)**

Sheep were premedicated with intramuscular medetomidine (40 µg/kg) and ketamine (1 mg/kg). Anesthesia was induced and maintained with intermittent intravenous boluses of ketamine (1-2 mg/kg) and propofol (1-2 mg/kg) as needed. Oxygen was supplied with facemask. Intravenous fluid therapy with Lactated Ringer's solution (10 ml/kg/h) was administered throughout the procedure. Sheep were returned to the group pen, when they recovered from anesthesia and had normal locomotor activity.

## 1.4 Terminal sedation

Sheep were sedated with intravenous xylazine (0.5mg/kg) with or without vatinoxan (750 µg/kg). When appropriate sedation was achieved, approximately at 10 minutes later, sheep were euthanized with pentobarbital (100 mg/kg) IV.

## 2 The surgical procedures

### 2.1 First stage surgery (prefabrication in IVBs phase)

All the surgical procedures were performed in the operating theatres of the Equine and Small Animal Medicine, Veterinary Teaching Hospital, University of Helsinki. Food was withheld for at least 12 hours prior to any intervention under GA, with water accessible *ad libitum*. TW performed the surgeries together with AA. The GA was performed by veterinary anesthesiologists (KS and MA). The details for the premedication, GA, perioperative fluids, prophylactic antibiotic, and analgesia protocol is provided in the supplementary appendix; section 1.

Under GA, with the sheep put to a left lateral recumbency position, the fleece over the right aspect of the neck and forehead was trimmed and the skin of the surgical field was carefully disinfected, prepped, and draped in a sterile fashion. Prior to incision, the tissues were infiltrated with local anesthetic (LA) lidocaine cum adrenaline (maximum 4 mg/kg of lidocaine). A lazy S incision was carried out on the dorsal right aspect of the neck, a rostral extension of the incision was performed over the forehead when the exposure of the pericranium was needed in MP and MVP groups (Appendix Fig. 1D). Sharp and blunt dissection with meticulous hemostasis was performed through subcutaneous tissues followed by the creation of the brachiocephalic muscular pouch (Appendix Fig. 1A, B) at its rostral part ventral to the splenius muscle. The bone blocks (BBs) were implanted into the muscular pouches in M-group sheep after soaking in venous blood (Appendix Fig. 1C). In MP-group sheep, a nonvascularized pericranial graft was harvested for wrapping the blood-soaked BB with the cambium layer facing inwards (Appendix Fig. 1D-I). In MVP-group, an axial pericranial vascularized flap based on branches of the occipital, posterior auricular, and posterior meningeal arteries was raised (Appendix Fig. 1J). The blood-soaked BB was wrapped with the vascularized pericranial flap facing its cambium layer. In both MP- and MVP-group, the pericranium-wrapped BBs were implanted in a similar muscular pouch as done in M-group (Appendix Fig. 1I, K). After infiltrating tissues with 5 ml long-acting LA (Ropivacain, 10 mg/ml, Fresenius Kabi AB), the muscular pouch and subcutaneous tissues were closed by resorbable Vicryl 3-0 suture (Ethicon), and the skin was closed by 2-0 Ethilon suture (Appendix Fig. 1L) to be removed 10 days postoperatively.

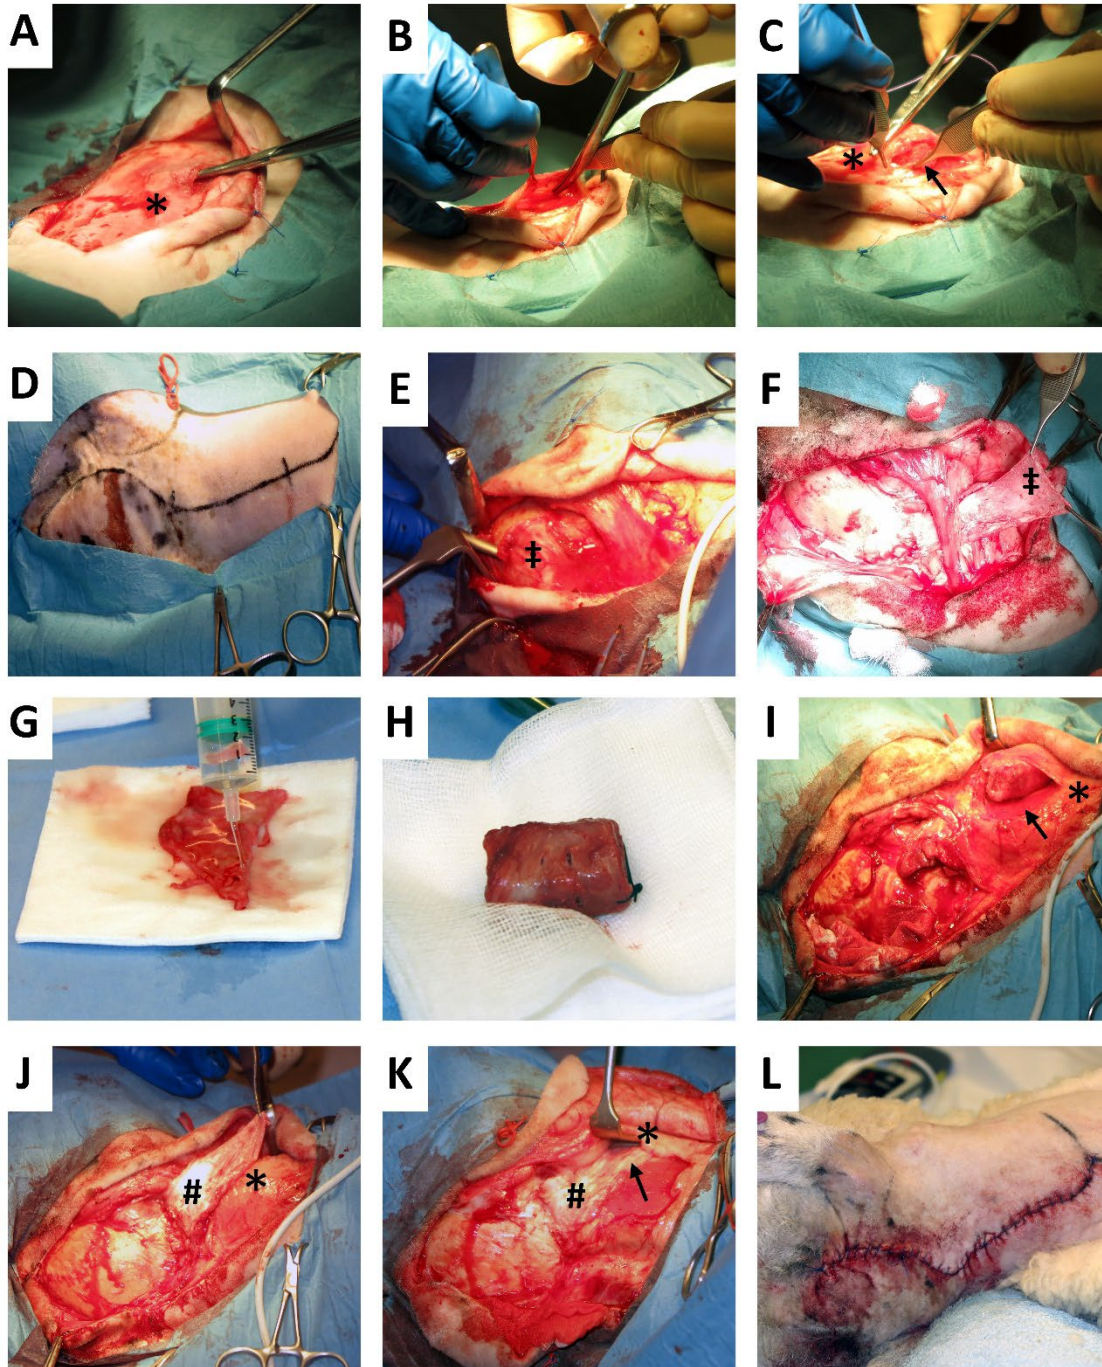

*Appendix Fig. 1: The first surgery for implanting the bone blocks (BBs) into the tested IVBs, i.e., muscle pouch (M) (A-C), pericranial graft with muscle pouch (MP) (D-I), or pericranial flap with muscle pouch (MVP) (J-L). In all the sheep, the muscular pouch (arrow) was created in the brachiocephalic muscle (\*) (A and B). In M-group, the BBs were inserted directly into the pouch (C). In MP-group, a periosteal/pericranial graft (#) was elevated by a periosteal elevator (E), harvested (F and G) to wrap the BBs (H) before implanting in the muscular pouches (arrow) (I). In MVP-group, periosteal/pericranial vascularized flaps (#) were elevated to wrap the BBs before implanting in the muscular pouches (J and K). The surgical wound was closed in layers (L).*

## **2.2 Second stage surgery (reconstructive phase)**

After the pre-reconstructive CT scans, the sheep were immediately moved to the operating room where they were prepared for the second surgery under GA by positioning, prepping, and draping in a sterile fashion, as previously described, exposing the right dorsolateral aspect of the neck and the right submandibular region. Similar to the first surgery, the same protocol for LA infiltration was applied. A lazy S incision was performed on the right lateral aspect of the neck with a submandibular extension towards the right mandibular angle region. Sharp and blunt dissection with careful hemostasis was performed to expose superficial neck muscles. The prefabricated TEB flap was raised by sharp dissection through the brachiocephalic muscle to include the prevascularized BB with a surrounding muscle tissue as a myoosseous flap (Appendix Fig. 2). The flap dissection involved the preservation of the pedicle which comprises occipital artery branches to the muscle segment (Appendix Fig. 2A, B). These branches showed a consistent close relation to the accessory nerve. The right mandibular angle was exposed through the sharp dissection of the pterygomasseteric sling. A CSD corresponding to the intraoperative dimensions of the BB in the prefabricated TEB flap was created using a bone saw (Stryker or DePuy Synthes) under saline irrigation. The defects were  $29 (\pm 2) \times 18 (\pm 1)$  mm in average. The transplanted flap was used for CSD reconstruction after careful exposure of the BB surfaces which faced the CSD edges (Appendix Fig. 2C-E). The internal fixation was accomplished by a miniplate and screws (Appendix Fig. 2E). In three randomly assigned sheep (one sheep/IVB), the prevascularized BBs were harvested for histological analysis and the CSDs were reconstructed using fresh blood-soaked BB, and these constituted the control group. The surgical wound was closed in layers with resorbable 3-0 Vicryl and PDS-II (Ethicon).

## **2.3 The recovery and postoperative course**

All sheep recovered from the surgical procedures under GA without complications. Generally, sheep were able to return to normal activity, diet, and rumination after the recovery. However, one week after the first surgery, one sheep from M-group showed dyspnea and decreased activity. The sheep was euthanized based on veterinarian decision; the necropsy revealed a previously undiagnosed ventricular septal defect.

During the postoperative course, the expected postoperative edema of the surgical wound was seen with no signs of distress or pain under the implemented analgesic protocol. Generally, surgical wound healing was uneventful with no signs of infection throughout the follow up period. However, one sheep (M-group) developed a seroma after the first surgery, which resolved after aseptic aspiration. After the second surgery, another sheep (M-group) had a partial acute wound disruption in the neck due to a thrust by another sheep. The wound was managed by local debridement and allowed to heal secondarily under antibiotic coverage (ampicillin IV, A-Pen; 1g bid, Orion Pharma). A

sheep from MVP-group developed a late local inflammation in the retromandibular region 6 weeks after the second surgery. The inflammation resolved under antibiotics (ampicillin IV, A-pen; 1g bid) for four days.

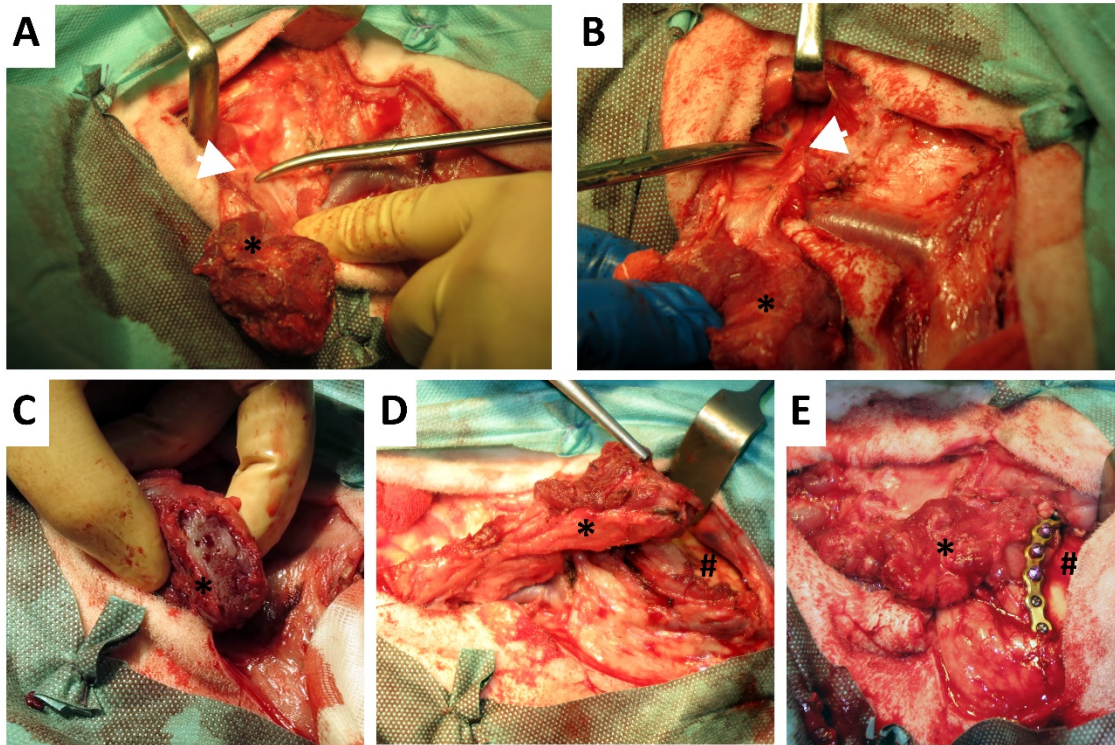

*Appendix Fig. 2: The second (reconstructive) surgical phase. The instrument and white arrow heads show the vascular pedicle during raising the prefabricated TEB flap (\*) (A and B). Evident vascularization through the biomaterial pores was seen intraoperatively (C). The prefabricated TEB flap (\*) was transplanted for reconstruction of mandibular angle (#) bone defect (D and E).*

### **3 The CT and $\mu$ CT scans**

Under GA, each sheep underwent CT scan of the head and neck, first without and then with IV contrast material (CT angiography, CTA). The scans were performed by a LightSpeed VCT 64 slice CT Scanner (GE Medical Systems, USA). The contrast material (Omnipaque 300mg I/ml, Oy GE Healthcare Bio-Sciences Ab) was injected IV via a cannula in the cephalic vein, at 2 ml/kg with a rate of 3 ml/s using a power injector. The scanning parameters for pre-reconstructive CT involved the settings for voltage at 120 KV; a maximum of 698 mAs; 0.625 mm slice thickness, rotation time of 0.5s; and a total collimation width of 40 mm. For decreasing plates and screws artefacts, the parameters for the post-reconstructive and terminal-point CT were set at a voltage peak of 140 KV; a maximum of 609 mAs; 0.625 mm slice thickness, rotation time of 0.7s; and a total collimation width of 40 mm.

For the  $\mu$ CT scanning, a GE phoenix nanotom s system (General Electric Sensing and Inspection Technologies/Phoenix X-ray, Germany) was used. The samples were imaged at 50.0  $\mu$ m voxel size, with X-ray generator settings at 80 kV and 150  $\mu$ A, using a 1 mm Al filter. A total of 1200 projection images were recorded over a 360-degree rotation of the sample with 3 x 500 ms exposure time for each projection. The 3D volume data was reconstructed from these data sets using Bruker NRecon version 1.6.10.2 (Bruker, Belgium).

#### **4 Methodology for CT and $\mu$ CT analysis**

For the CT analyses, each DICOM dataset was loaded into CTAnalyser (CTAn) software 1.18.8.0 (Bruker, Belgium). For each dataset (sheep/timepoint), two volumes of interest (VOI) were manually registered, one for the residual biomaterial (RM), defined by its geometry and pattern, and the second VOI was for the newly formed bone (NB) continuous with the edges of the defect (Appendix Fig. 3A, B). On the binary selection preview, the histograms from the dataset helped to perform the greyscale thresholding. The lower limit was set within the valley of the bimodal histogram which achieved the least noise, the upper limit was adjusted at a level less than the maximum to exclude the plates and screws from the analysis. Subsequently, the 3D analysis was performed on the custom processing preview after global thresholding with the preset greyscale levels and despeckling to remove white speckles less than 100 voxels in 3D space and applied to image.

In a parallel setting, the change in the volume of the BB was evaluated by comparing the 3D reconstructed models from datasets of each timepoint to estimate the resorbed volume at the terminal endpoint as compared to the initial pre-reconstruction volume. The detailed protocol for the 3D-model reconstruction and volume comparison is provided in the next section (section 5).

For the  $\mu$ CT analysis, the datasets were first loaded into DataViewer 1.5.4.0 (Bruker, Belgium) for reorientation, all the datasets were sagittally reoriented for consistency and saved as new datasets. Further processing was performed on CTAn software, the new datasets were loaded and two VOIs were registered for each dataset. The RM-VOI included the residual biomaterial based on its characteristic pattern, the NB-VOI included the newly formed bone within the corresponding dimensions of the reconstructed defect. Those dimensions were recorded based on the excised bone pieces and verified in the mid-sagittal plane of the reconstructed 3D model in CTvox 3.3.0 (Bruker, Belgium) (Appendix Fig. 3C, D). Since the  $\mu$ CT scanned samples did not have the plates and screws, automatic thresholding was feasible. The 3D analysis of each VOI was performed in the custom processing preview of CTAn after automatic thresholding (Otsu's method) and subsequent despeckling to remove white speckles less than 1000 voxels in 3D space and applied to image.

## 5 Methodology for CT-3D models comparison

The sheep CT data was 3D reconstructed using open source 3DSlicer software ([www.slicer.org](http://www.slicer.org)). The volumes reconstructed for the analysis were: pre-reconstruction (Pre-vol), post-reconstruction (Post-vol), and terminal volume (End-vol). The 3D models were further cleaned from noise and extra objects using 3DataExpert software (DeskArtes Oy, Finland).

Volume of Interest (VOI) is defined as the 3D volume reconstructed by 3DSlicer algorithm using the threshold value of 300, lower bone density value, and smoothing factor 0.5. The volumetric reconstruction is an interpretation of grey-value voxels defined by CT-image stacks and defines the geometry of *bone dense* parts of object. Tissues with lower threshold than 300 were considered as empty space. Two VOIs were used in this analysis; reconstruction volume as-is and reconstruction volume solidified, small holes filled by manipulating the faceted geometry in 3DataExpert. Two geometries were used to validate the method for porous VOI that was seen in some of cases.

Since different CT based geometries naturally were in different coordinates, the reconstructed 3D models were aligned into same spatial orientation. For reorientation, open source CloudCompare software ([cloudcompare.org](http://cloudcompare.org)) was used. Post-vol reconstruction was used as placeholder for 3D-models. Both Pre-vol and End-vol were oriented using landmarks of Post-vol. Reorientation was done using Post-vol due to assumingly more accurate volumetric correspondence with Pre-vol. Post-vol and End-vol were aligned using mandible landmarks to reach best accuracy. The functions used for reorientation were three-point registration and freehand translate/rotation (Appendix Fig. 4A).

Reoriented 3D model volumes were measured using 3DataExpert (DeskArtes Oy, Finland). The volume that was reconstructed from Pre-vol CT was used to delimit a corresponding spatial region in terminal state to find the volume of bone dense parts of End-vol inside VOI. Using Boolean operator – subtracting volumes – it was possible to calculate the volume of End-vol located inside the VOI, thus, it was possible to estimate the remodeling percentage (Appendix Fig. 4B).



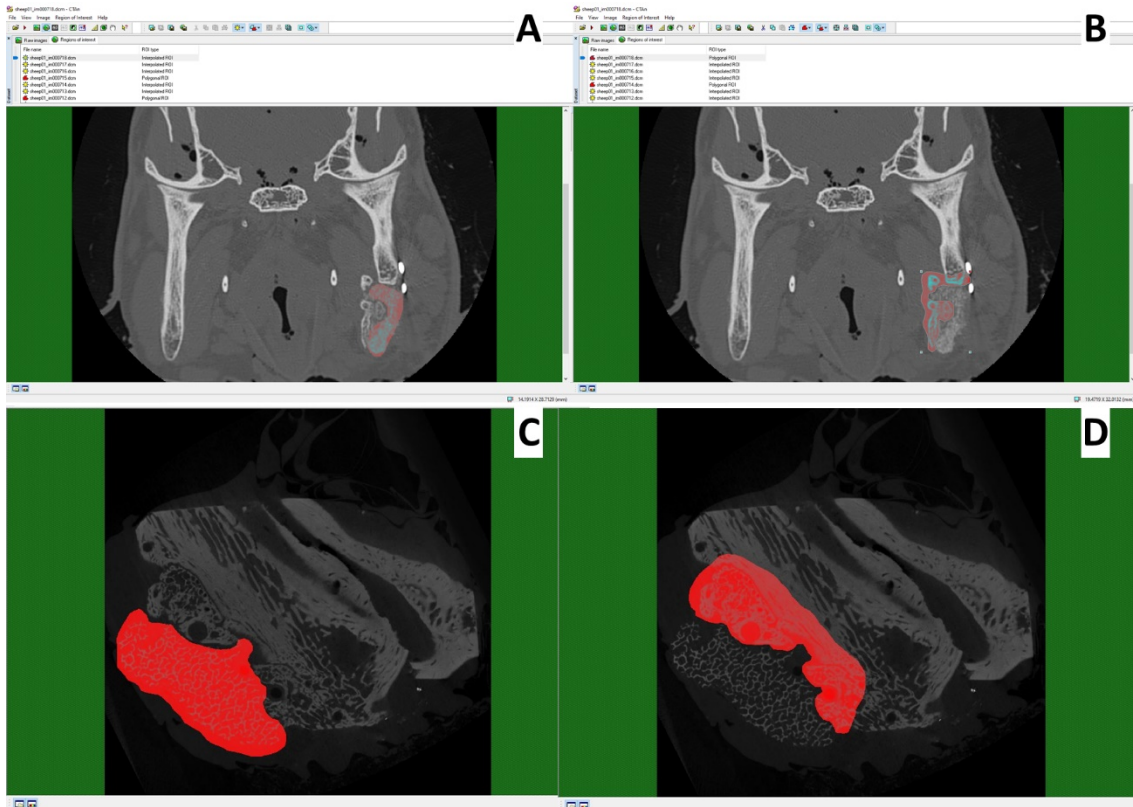

Appendix Fig. 3: Representative images for the registration of regions of interest (ROIs) for analyzing CT (A and B) and  $\mu$ CT (C and D) data volumes of interest (VOIs). On CTAn software, two ROIs were drawn per slice in the slices covering the reconstructed defect in each sheep. The ROIs were for both the residual biomaterial (red-shaded in A and C) and the newly formed bone (red-shaded in B and D).

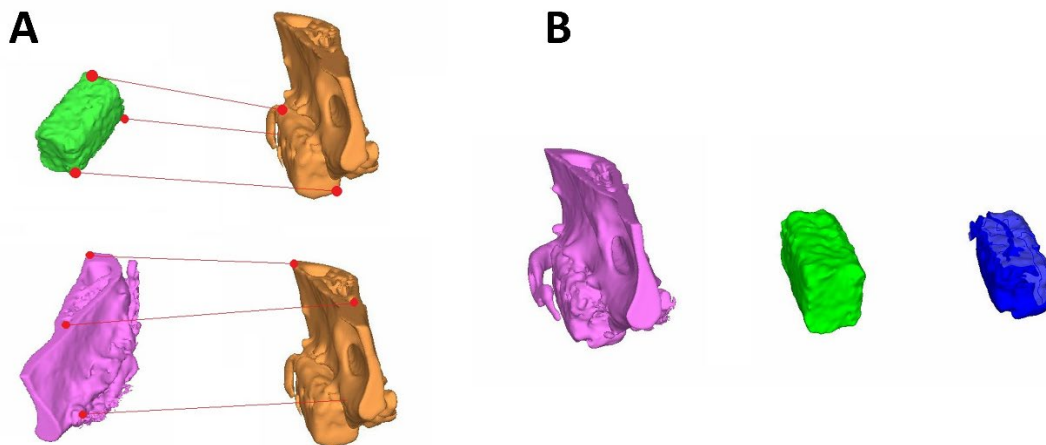

Appendix Fig. 4: Illustrations of the orientation and alignment of models for Boolean operation. The reconstructed models were aligned using Post-vol (gold) as a placeholder for both Pre-vol (green) and End-vol (pink) (A). Once the Pre-vol (green) and End-vol (pink) were aligned to share same coordinates, the End-vol was Boolean intersected with Pre-vol resulting in the volume at terminal state within original state TEB volume (blue) (B).

## 6 Methodology of histological preparation of samples

### 6.1 Immunohistochemistry on paraffin embedded sections

After heat-induced antigen retrieval (20 minutes at 99°C in 10 mM citrate buffer, pH 6), the IHC utilized the anti-von Willebrand factor (vWF) antibody (1:1000; rabbit polyclonal, Ab6994, Cambridge, UK), detected with polymer-linked secondary antibody and peroxidase (BrightVision + Poly-HRP kit, ImmunoLogic, Duiven, Netherlands) and DAB chromogen according to the manufacturer's instructions. For the quantification of the percentage of DAB-positive cells/total cells, the scanned slides were processed in the open-source digital pathology software QuPath version 0.2.3 (Bankhead et al. 2017). Additionally, the vessels were counted in CaseViewer (2.4, 3DHISTECH, Budapest, Hungary) at 10× in seven arbitrary circular fields of 1.1 mm<sup>2</sup> surface area/field.

### 6.2 Undecalcified resin embedded sections processing

The formalin-fixed samples were dehydrated in ascending alcohol series, cleared in xylene, and embedded gradually into methyl methacrylate (MMA). The 5µm-thin slices were sectioned with a hard tissue microtome (Leica, SM2500 Large Scale, Heavy duty Sectioning System) and collected on albumin-glycerin coated slides. The slides were heated at +60°C for 3-5 days after sectioning for better adherence of the sections to the slides. The sections were then stained by Masson Goldner Trichrome (MT) stain.

## 7 Statistical analysis reporting tables

*Appendix Table 7.1: Statistical analysis for the IVB vascularization scale on preoperative CTA*

Descriptive statistics for the IVB vascularization scaling on preoperative CTA

| IVB condition | N Analysis | Mean | Standard Deviation | SE of Mean |
|---------------|------------|------|--------------------|------------|
| M             | 4          | 2.25 | 0.6455             | 0.32275    |
| MP            | 5          | 2    | 1                  | 0.44721    |
| MVP           | 5          | 2    | 0.70711            | 0.31623    |

Homogeneity of Variance test: Levene's test (Absolute deviations)

|       | DF | Sum of Squares | Mean Square | F Value | Prob>F  |
|-------|----|----------------|-------------|---------|---------|
| Model | 2  | 0.21429        | 0.10714     | 0.94286 | 0.41885 |
| Error | 11 | 1.25           | 0.11364     |         |         |

At the 0.05 level, the population variances are not significantly different.

One Way ANOVA for the IVB vascularization scaling on preoperative CTA

|       | DF | Sum of Squares | Mean Square | F Value | Prob>F  | R-square | $\eta^2$  | $\omega^2$ |
|-------|----|----------------|-------------|---------|---------|----------|-----------|------------|
| Model | 2  | 0.17857        | 0.08929     | 0.13547 | 0.87474 | 0.02404  | 0.0240383 | 0          |
| Error | 11 | 7.25           | 0.65909     |         |         |          |           |            |
| Total | 13 | 7.42857        |             |         |         |          |           |            |

*Appendix Table 7.2: Statistical analysis for the bone block volumes at the end of prefabrication phase*

Descriptive statistics for the bone block volumes after prefabrication (RM/TV%)

| IVB condition | N Analysis | Mean     | Standard Deviation | SE of Mean |
|---------------|------------|----------|--------------------|------------|
| M             | 4          | 48.58328 | 14.42804           | 7.21402    |
| MP            | 5          | 48.15132 | 11.0101            | 4.92386    |
| MVP           | 5          | 50.77188 | 13.39697           | 5.99131    |

Homogeneity of Variance test: Levene's test (Absolute deviations)

|       | DF | Sum of Squares | Mean Square | F Value | Prob>F  |
|-------|----|----------------|-------------|---------|---------|
| Model | 2  | 35.39143       | 17.69571    | 0.36093 | 0.70498 |
| Error | 11 | 539.30982      | 49.02817    |         |         |

At the 0.05 level, the population variances are not significantly different.

One Way ANOVA for the bone block volumes at the end of the prefabrication phase

|       | DF | Sum of Squares | Mean Square | F Value | Prob>F  | R-square | $\eta^2$  | $\omega^2$ |
|-------|----|----------------|-------------|---------|---------|----------|-----------|------------|
| Model | 2  | 19.37256       | 9.68628     | 0.05831 | 0.94365 | 0.01049  | 0.0104905 | 0          |
| Error | 11 | 1827.30874     | 166.11898   |         |         |          |           |            |
| Total | 13 | 1846.68129     |             |         |         |          |           |            |

*Appendix Table 7.3: Statistical analysis for the IHC of vWF (positive/total cells%)*

Descriptive statistics for the IHC (vWF positive cells/total cells %)

|     | N Analysis | Mean     | Standard Deviation | SE of Mean |
|-----|------------|----------|--------------------|------------|
| M   | 7          | 13.98892 | 4.65449            | 1.75923    |
| MP  | 7          | 19.15433 | 4.37695            | 1.65433    |
| MVP | 7          | 20.15669 | 2.11938            | 0.80105    |

N in this analysis refers to the different sections/blocks from all parts of the sampled blocks at the end of prefabrication phase

Homogeneity of Variance test: Levene's test (Absolute deviations)

|       | DF | Sum of Squares | Mean Square | F Value | Prob>F  |
|-------|----|----------------|-------------|---------|---------|
| Model | 2  | 24.55285       | 12.27642    | 3.37721 | 0.05683 |
| Error | 18 | 65.43141       | 3.63508     |         |         |

At the 0.05 level, the population variances are not significantly different.

One Way ANOVA for the vWFpositive/total cells %

|       | DF | Sum of Squares | Mean Square | F Value | Prob>F  | R-square | $\eta^2$ | $\omega^2$ |
|-------|----|----------------|-------------|---------|---------|----------|----------|------------|
| Model | 2  | 153.36398      | 76.68199    | 5.07673 | 0.01785 | 0.36065  | 0.360647 | 0.2797     |
| Error | 18 | 271.88285      | 15.1046     |         |         |          |          |            |
| Total | 20 | 425.24683      |             |         |         |          |          |            |

Bonferroni means comparisons

|        | MeanDiff | SEM    | t Value | Prob    | Alpha | Sig | LCL      | UCL    |
|--------|----------|--------|---------|---------|-------|-----|----------|--------|
| MP M   | 5.16541  | 2.0774 | 2.48647 | 0.06883 | 0.05  | 0   | -0.31716 | 10.648 |
| MVP M  | 6.16776  | 2.0774 | 2.96898 | 0.02466 | 0.05  | 1   | 0.6852   | 11.65  |
| MVP MP | 1.00235  | 2.0774 | 0.4825  | 1       | 0.05  | 0   | -4.48021 | 6.4849 |

*Appendix Table 7.4: Statistical analysis for the blood vessels density (vessels/mm<sup>2</sup>) at the end of the prefabrication phase*

Descriptive statistics for the IHC (number of blood vessels/mm<sup>2</sup>)

|     | N | Mean     | Standard Deviation | SE of Mean |
|-----|---|----------|--------------------|------------|
| M   | 7 | 16.42857 | 4.70309            | 1.7776     |
| MP  | 7 | 19.35714 | 3.13202            | 1.18379    |
| MVP | 7 | 23.14286 | 5.71339            | 2.15946    |

N in this analysis refers to the different sections/blocks from all parts of the sampled blocks at the end of prefabrication phase

Homogeneity of Variance test: Levene's test (Absolute deviations)

|       | DF | Sum of Squares | Mean Square | F Value | Prob>F |
|-------|----|----------------|-------------|---------|--------|
| Model | 2  | 12.07191       | 6.03596     | 0.9481  | 0.406  |
| Error | 18 | 114.59475      | 6.36638     |         |        |

At the 0.05 level, the population variances are not significantly different.

One Way ANOVA for the blood vessels density among groups

|       | DF | Sum of Squares | Mean Square | F Value | Prob>F  | R-square | $\eta^2$  | $\omega^2$ |
|-------|----|----------------|-------------|---------|---------|----------|-----------|------------|
| Model | 2  | 158.64286      | 79.32143    | 3.68529 | 0.04555 | 0.29052  | 0.2905167 | 0.2037     |
| Error | 18 | 387.42857      | 21.52381    |         |         |          |           |            |
| Total | 20 | 546.07143      |             |         |         |          |           |            |

Bonferroni means comparisons

|        | MeanDiff | SEM     | t Value | Prob    | Alpha | Sig | LCL      | UCL    |
|--------|----------|---------|---------|---------|-------|-----|----------|--------|
| MP M   | 2.92857  | 2.47985 | 1.18095 | 0.75898 | 0.05  | 0   | -3.61611 | 9.4733 |
| MVP M  | 6.71429  | 2.47985 | 2.70754 | 0.04326 | 0.05  | 1   | 0.1696   | 13.259 |
| MVP MP | 3.78571  | 2.47985 | 1.52659 | 0.43273 | 0.05  | 0   | -2.75897 | 10.33  |

*Appendix Table 7.5: Statistical analysis for the CT measured NB/TV% in the post-reconstructive follow up*

Descriptive statistics for the CT measured new bone formation NB/TV% at first follow up point (post-reconstructive)

| Reconstructive gp. | N | Mean     | Standard Deviation | SE of Mean |
|--------------------|---|----------|--------------------|------------|
| control_post       | 3 | 14.72904 | 9.49347            | 5.48106    |
| M_post             | 3 | 10.87068 | 3.94528            | 2.27781    |
| MP_post            | 4 | 10.00965 | 2.8762             | 1.4381     |
| MVP_post           | 4 | 14.04763 | 4.6115             | 2.30575    |

Homogeneity of Variance test: Levene's test (Absolute deviations)

|       | DF | Sum of Squares | Mean Square | F Value | Prob>F  |
|-------|----|----------------|-------------|---------|---------|
| Model | 3  | 47.57323       | 15.85774    | 3.63318 | 0.05257 |
| Error | 10 | 43.64703       | 4.3647      |         |         |

At the 0.05 level, the population variances are not significantly different.

One Way ANOVA for the CT measured NB/TV% on post-reconstructive time point

|       | DF | Sum of Squares | Mean Square | F Value | Prob>F  | R-square | $\eta^2$ | $\omega^2$ |
|-------|----|----------------|-------------|---------|---------|----------|----------|------------|
| Model | 3  | 56.98011       | 18.99337    | 0.63312 | 0.61032 | 0.15962  | 0.159618 | 0          |
| Error | 10 | 299.99781      | 29.99978    |         |         |          |          |            |
| Total | 13 | 356.97792      |             |         |         |          |          |            |

*Appendix Table 7.6: Statistical analysis for the CT measured NB/TV% in the terminal post-reconstructive follow up point*

Descriptive statistics for the CT measured new bone formation NB/TV% at second follow up point (terminal endpoint)

| Reconstructive gp. | N Analysis | Mean     | Standard Deviation | SE of Mean |
|--------------------|------------|----------|--------------------|------------|
| NB_control_end     | 3          | 22.35915 | 9.2922             | 5.36486    |
| NB_M_end           | 3          | 17.36185 | 3.74946            | 2.16475    |
| NB_MP_end          | 4          | 18.30101 | 7.42927            | 3.71463    |
| NB_MVP_end         | 4          | 24.75492 | 7.88538            | 3.94269    |

Homogeneity of Variance test: Levene's test (Absolute deviations)

|       | DF | Sum of Squares | Mean Square | F Value | Prob>F  |
|-------|----|----------------|-------------|---------|---------|
| Model | 3  | 26.15918       | 8.71973     | 0.58751 | 0.63689 |
| Error | 10 | 148.41885      | 14.84188    |         |         |

At the 0.05 level, the population variances are not significantly different.

One Way ANOVA for the CT measured NB/TV% on terminal endpoint time point

|       | DF | Sum of Squares | Mean Square | F Value | Prob>F  | R-square | $\eta^2$  | $\omega^2$ |
|-------|----|----------------|-------------|---------|---------|----------|-----------|------------|
| Model | 3  | 130.29833      | 43.43278    | 0.78551 | 0.52885 | 0.19071  | 0.1907108 | 0          |
| Error | 10 | 552.92644      | 55.29264    |         |         |          |           |            |
| Total | 13 | 683.22477      |             |         |         |          |           |            |

*Appendix Table 7.7: Statistical analysis for the CT measured NB/TV% between two follow up points*

Paired sample t test for each group between the two follow up time points regarding CT measured N

| Control gp      | N        | Mean     | SD      | SEM     | Median   | Hedge's g | cohen's d |
|-----------------|----------|----------|---------|---------|----------|-----------|-----------|
| NB_control_post | 3        | 14.72904 | 9.49347 | 5.48106 | 11.00493 | 1.1744933 | 1.4385    |
| NB_control_end  | 3        | 22.35915 | 9.2922  | 5.36486 | 24.75822 |           |           |
| Difference      | 3        | -7.63011 | 5.30438 | 3.06248 | -4.69663 |           |           |
| Overall         | 6        | 18.54409 | 9.38371 | 3.83088 | 18.43044 |           |           |
| t Statistic     | DF       | Prob> t  |         |         |          |           |           |
|                 | -2.49148 | 2        | 0.13033 |         |          |           |           |

| M-gp        | N         | Mean     | SD       | SEM     | Median   | Hedge's g | cohen's d |
|-------------|-----------|----------|----------|---------|----------|-----------|-----------|
| NB_M_post   | 3         | 10.87068 | 3.94528  | 2.27781 | 9.28603  | 15.941367 | 19.524    |
| NB_M_end    | 3         | 17.36185 | 3.74946  | 2.16475 | 16.14293 |           |           |
| Difference  | 3         | -6.49118 | 0.33247  | 0.19195 | -6.40944 |           |           |
| Overall     | 6         | 14.11626 | 4.94875  | 2.02032 | 14.86772 |           |           |
| t Statistic | DF        | Prob> t  |          |         |          |           |           |
|             | -33.81632 | 2        | 8.73E-04 |         |          |           |           |

| MP-gp       | N        | Mean     | SD      | SEM     | Median   | Hedge's g | cohen's d |
|-------------|----------|----------|---------|---------|----------|-----------|-----------|
| NB_MP_post  | 4        | 10.00965 | 2.8762  | 1.4381  | 10.84129 | 1.5707607 | 1.8138    |
| NB_MP_end   | 4        | 18.30101 | 7.42927 | 3.71463 | 20.31765 |           |           |
| Difference  | 4        | -8.29136 | 4.57137 | 2.28569 | -9.47636 |           |           |
| Overall     | 8        | 14.15533 | 6.84411 | 2.41976 | 12.1432  |           |           |
| t Statistic | DF       | Prob> t  |         |         |          |           |           |
|             | -3.62751 | 3        | 0.03606 |         |          |           |           |

|             | N       | Mean     | SD      | SEM     | Median   | Hedge's g | cohen's d |
|-------------|---------|----------|---------|---------|----------|-----------|-----------|
| NB_MVP_post | 4       | 14.04763 | 4.6115  | 2.30575 | 13.70252 | 0.9678709 | 1.1176    |
| NB_MVP_end  | 4       | 24.75492 | 7.88538 | 3.94269 | 22.50888 |           |           |
| Difference  | 4       | -10.7073 | 9.58061 | 4.7903  | -7.11138 |           |           |
| Overall     | 8       | 19.40127 | 8.27758 | 2.92657 | 18.70258 |           |           |
| t Statistic | DF      | Prob> t  |         |         |          |           |           |
|             | -2.2352 | 3        | 0.11146 |         |          |           |           |

*Appendix Table 7.8: Statistical analysis for the CT measured RM/TV% in the first post-reconstructive follow up point*

Descriptive statistics for the CT measured residual biomaterial RM/TV% at first follow up point (post-reconstructive)

| Reconstructive gp. | N Analysis | Mean     | Standard Deviation | SE of Mean |
|--------------------|------------|----------|--------------------|------------|
| contol_post        | 3          | 25.67449 | 13.94549           | 8.05143    |
| M_post             | 3          | 24.54738 | 10.97626           | 6.33715    |
| MP_post            | 4          | 18.52147 | 11.23636           | 5.61818    |
| MVP_post           | 4          | 15.8889  | 8.29575            | 4.14788    |

Homogeneity of Variance test: Levene's test (Absolute deviations)

|       | DF | Sum of Squares | Mean Square | F Value | Prob>F  |
|-------|----|----------------|-------------|---------|---------|
| Model | 3  | 40.23291       | 13.41097    | 0.48603 | 0.69952 |
| Error | 10 | 275.9311       | 27.59311    |         |         |

At the 0.05 level, the population variances are not significantly different.

One Way ANOVA for the CT measured RM/TV% on post-reconstructive time point

|       | DF | Sum of Squares | Mean Square | F Value | Prob>F  | R-square | $\eta^2$  | $\omega^2$ |
|-------|----|----------------|-------------|---------|---------|----------|-----------|------------|
| Model | 3  | 230.05524      | 76.68508    | 0.63108 | 0.61149 | 0.15919  | 0.1591867 | 0          |
| Error | 10 | 1215.13612     | 121.51361   |         |         |          |           |            |
| Total | 13 | 1445.19137     |             |         |         |          |           |            |

*Appendix Table 7.9: Statistical analysis for the CT measured RM/TV% in the terminal post-reconstructive follow up point*

Descriptive statistics for the CT measured residual biomaterial RM/TV% at second follow up point (terminal endpoint)

| Reconstructive gp. | N Analysis | Mean     | Standard Deviation | SE of Mean |
|--------------------|------------|----------|--------------------|------------|
| control_end        | 3          | 17.85713 | 11.03012           | 6.36824    |
| M_end              | 3          | 18.45314 | 4.76078            | 2.74864    |
| MP_end             | 4          | 14.93184 | 8.84997            | 4.42499    |
| MVP_end            | 4          | 9.79766  | 7.30445            | 3.65222    |

Homogeneity of Variance test: Levene's test (Absolute deviations)

|       | DF | Sum of Squares | Mean Square | F Value | Prob>F  |
|-------|----|----------------|-------------|---------|---------|
| Model | 3  | 34.59816       | 11.53272    | 0.71198 | 0.56676 |
| Error | 10 | 161.97997      | 16.198      |         |         |

At the 0.05 level, the population variances are not significantly different.

One Way ANOVA for the CT measured RM/TV% on terminal endpoint time point

|       | DF | Sum of Squares | Mean Square | F Value | Prob>F | R-square | $\eta^2$  | $\omega^2$ |
|-------|----|----------------|-------------|---------|--------|----------|-----------|------------|
| Model | 3  | 168.20781      | 56.06927    | 0.8201  | 0.5119 | 0.19745  | 0.1974512 | 0          |
| Error | 10 | 683.68788      | 68.36879    |         |        |          |           |            |
| Total | 13 | 851.89569      |             |         |        |          |           |            |

Appendix Table 7.10: Statistical analysis of CT measured RM/TV% between two follow up points

Paired sample t test for each group between the two follow up time points regarding CT measured RM/TV%

|                | N       | Mean     | SD       | SEM     | Median   | Hedge's g | cohen's d |
|----------------|---------|----------|----------|---------|----------|-----------|-----------|
| RM_contol_post | 3       | 25.67449 | 13.94549 | 8.05143 | 32.9186  |           | 0.6665018 |
| RM_control_end | 3       | 17.85713 | 11.03012 | 6.36824 | 15.66969 |           |           |
| Difference     | 3       | 7.81736  | 9.57664  | 5.52907 | 3.10152  |           |           |
| Overall        | 6       | 21.76581 | 12.03285 | 4.91239 | 22.74338 |           |           |
| t Statistic    | DF      | Prob> t  |          |         |          |           |           |
|                | 1.41386 | 2        | 0.29298  |         |          |           |           |

|             | N      | Mean     | SD       | SEM     | Median   | Hedge's g | cohen's d |
|-------------|--------|----------|----------|---------|----------|-----------|-----------|
| RM_M_post   | 3      | 24.54738 | 10.97626 | 6.33715 | 24.18053 |           | 0.8005403 |
| RM_M_end    | 3      | 18.45314 | 4.76078  | 2.74864 | 18.25282 |           |           |
| Difference  | 3      | 6.09424  | 6.21571  | 3.58864 | 5.92771  |           |           |
| Overall     | 6      | 21.50026 | 8.27039  | 3.37637 | 20.78187 |           |           |
| t Statistic | DF     | Prob> t  |          |         |          |           |           |
|             | 1.6982 | 2        | 0.23157  |         |          |           |           |

|             | N       | Mean     | SD       | SEM     | Median   | Hedge's g | cohen's d |
|-------------|---------|----------|----------|---------|----------|-----------|-----------|
| RM_MP_post  | 4       | 18.52147 | 11.23636 | 5.61818 | 17.95272 |           | 1.1081523 |
| RM_MP_end   | 4       | 14.93184 | 8.84997  | 4.42499 | 14.29021 |           |           |
| Difference  | 4       | 3.58963  | 2.80531  | 1.40266 | 3.66251  |           |           |
| Overall     | 8       | 16.72665 | 9.55813  | 3.37931 | 14.95668 |           |           |
| t Statistic | DF      | Prob> t  |          |         |          |           |           |
|             | 2.55917 | 3        | 0.08327  |         |          |           |           |

|             | N       | Mean     | SD      | SEM     | Median   | Hedge's g | cohen's d |
|-------------|---------|----------|---------|---------|----------|-----------|-----------|
| RM_MVP_post | 4       | 15.8889  | 8.29575 | 4.14788 | 18.67441 |           | 0.8120441 |
| RM_MVP_end  | 4       | 9.79766  | 7.30445 | 3.65222 | 10.20286 |           |           |
| Difference  | 4       | 6.09124  | 6.49616 | 3.24808 | 3.71093  |           |           |
| Overall     | 8       | 12.84328 | 7.93482 | 2.80538 | 16.01034 |           |           |
| t Statistic | DF      | Prob> t  |         |         |          |           |           |
|             | 1.87533 | 3        | 0.15742 |         |          |           |           |



**Appendix Table 7.11: Statistical analysis for the biomaterial remodeling rate % across CT time points.**

Descriptive statistics of the CT 3D-model comparisons for estimating the remodeling rate % across CT time points

| Prefabrication technique | N Analysis | Mean    | Standard Deviation | SE of Mean |
|--------------------------|------------|---------|--------------------|------------|
| M                        | 3          | 0.34636 | 0.15474            | 0.08934    |
| MP                       | 4          | 0.56557 | 0.14002            | 0.07001    |
| MVP                      | 4          | 0.65554 | 0.22121            | 0.11061    |

Homogeneity of Variance test: Levene's test (Absolute deviations)

|       | DF | Sum of Squares | Mean Square | F Value | Prob>F  |
|-------|----|----------------|-------------|---------|---------|
| Model | 2  | 0.00983        | 0.00491     | 0.63461 | 0.55487 |
| Error | 8  | 0.06193        | 0.00774     |         |         |

At the 0.05 level, the population variances are not significantly different.

One Way ANOVA for the 3D model CT measured remodeling rate %

|       | DF | Sum of Squares | Mean Square | F Value | Prob>F  | R-square | $\eta^2$  | $\omega^2$ |
|-------|----|----------------|-------------|---------|---------|----------|-----------|------------|
| Model | 2  | 0.16848        | 0.08424     | 2.65829 | 0.13025 | 0.39925  | 0.3992512 | 0.2317     |
| Error | 8  | 0.25351        | 0.03169     |         |         |          |           |            |
| Total | 10 | 0.42199        |             |         |         |          |           |            |

**Appendix Table 7.12: Statistical analysis for the  $\mu$ CT measured NB/TV% at terminal endpoint**

Descriptive statistics for the  $\mu$ CT measured newly formed bone NB/TV% at terminal endpoint

| Reconstructive gp. | N Analysis | Mean     | Standard Deviation | SE of Mean |
|--------------------|------------|----------|--------------------|------------|
| control            | 3          | 22.15831 | 9.74299            | 5.62512    |
| M                  | 3          | 17.27836 | 4.70374            | 2.71571    |
| MP                 | 4          | 21.41145 | 8.33139            | 4.1657     |
| MVP                | 4          | 30.81671 | 9.33143            | 4.66572    |

Homogeneity of Variance test: Levene's test (Absolute deviations)

|       | DF | Sum of Squares | Mean Square | F Value | Prob>F  |
|-------|----|----------------|-------------|---------|---------|
| Model | 3  | 33.21617       | 11.07206    | 1.38698 | 0.30292 |
| Error | 10 | 79.82838       | 7.98284     |         |         |

At the 0.05 level, the population variances are not significantly different.

One Way ANOVA for the  $\mu$ CT measured new bone formation NB/TV%

|       | DF | Sum of Squares | Mean Square | F Value | Prob>F  | R-square | $\eta^2$  | $\omega^2$ |
|-------|----|----------------|-------------|---------|---------|----------|-----------|------------|
| Model | 3  | 352.88617      | 117.62872   | 1.6719  | 0.23536 | 0.33403  | 0.3340297 | 0.1259     |
| Error | 10 | 703.56515      | 70.35652    |         |         |          |           |            |
| Total | 13 | 1056.45132     |             |         |         |          |           |            |

**Appendix Table 7.13: Statistical analysis for the  $\mu$ CT measured RM/TV% at terminal endpoint**

Descriptive statistics for the  $\mu$ CT measured residual biomaterial RM/TV% at terminal endpoint

| Reconstructive gp. | N Analysis | Mean     | Standard Deviation | SE of Mean |
|--------------------|------------|----------|--------------------|------------|
| control            | 3          | 8.86582  | 6.9664             | 4.02205    |
| M                  | 3          | 12.08487 | 3.97888            | 2.29721    |
| MP                 | 4          | 8.06858  | 4.7221             | 2.36105    |
| MVP                | 4          | 5.48695  | 5.98792            | 2.99396    |

Homogeneity of Variance test: Levene's test (Absolute deviations)

|       | DF | Sum of Squares | Mean Square | F Value | Prob>F  |
|-------|----|----------------|-------------|---------|---------|
| Model | 3  | 9.91777        | 3.30592     | 0.70774 | 0.56903 |
| Error | 10 | 46.71128       | 4.67113     |         |         |

At the 0.05 level, the population variances are not significantly different.

One Way ANOVA for the  $\mu$ CT measured residual biomaterial RM/TV%

|       | DF | Sum of Squares | Mean Square | F Value | Prob>F  | R-square | $\eta^2$ | $\omega^2$ |
|-------|----|----------------|-------------|---------|---------|----------|----------|------------|
| Model | 3  | 75.74884       | 25.24961    | 0.83281 | 0.50581 | 0.1999   | 0.1999   | 0          |
| Error | 10 | 303.18481      | 30.31848    |         |         |          |          |            |
| Total | 13 | 378.93364      |             |         |         |          |          |            |

**Appendix Table 7.14: Statistical analysis of endpoint histological BVs density (vessels/mm<sup>2</sup>)**

Descriptive statistics for the histologically measured blood vessels density (vessels/mm<sup>2</sup>) terminal endpoint samples

| Reconstructive gp. | N Analysis | Mean     | Standard Deviation | SE of Mean |
|--------------------|------------|----------|--------------------|------------|
| control            | 3          | 11.82222 | 1.28985            | 0.74469    |
| M                  | 3          | 12.15556 | 3.21132            | 1.85406    |
| MP                 | 4          | 18.5     | 3.54004            | 1.77002    |
| MVP                | 4          | 31.11667 | 10.39207           | 5.19604    |

Homogeneity of Variance test: Levene's test (Absolute deviations)

|       | DF | Sum of Squares | Mean Square | F Value | Prob>F |
|-------|----|----------------|-------------|---------|--------|
| Model | 3  | 87.96409       | 29.32136    | 2.35493 | 0.1334 |
| Error | 10 | 124.51053      | 12.45105    |         |        |

At the 0.05 level, the population variances are not significantly different.

One Way ANOVA for the histologically measured vessels/mm<sup>2</sup> at terminal samples

|       | DF | Sum of Squares | Mean Square | F Value | Prob>F  | R-square | $\eta^2$  | $\omega^2$ |
|-------|----|----------------|-------------|---------|---------|----------|-----------|------------|
| Model | 3  | 881.97233      | 293.99078   | 7.62555 | 0.00609 | 0.69583  | 0.6958328 | 0.5867     |
| Error | 10 | 385.5337       | 38.55337    |         |         |          |           |            |
| Total | 13 | 1267.50603     |             |         |         |          |           |            |

Bonferroni means comparisons

| Pairs       | MeanDiff | SEM     | t Value | Prob    | Alpha | Sig | LCL       | UCL    |
|-------------|----------|---------|---------|---------|-------|-----|-----------|--------|
| M control   | 0.33333  | 5.06974 | 0.06575 | 1       | 0.05  | 0   | -16.27939 | 16.946 |
| MP control  | 6.67778  | 4.74231 | 1.40813 | 1       | 0.05  | 0   | -8.86201  | 22.218 |
| MP M        | 6.34444  | 4.74231 | 1.33784 | 1       | 0.05  | 0   | -9.19534  | 21.884 |
| MVP control | 19.29444 | 4.74231 | 4.06858 | 0.01353 | 0.05  | 1   | 3.75466   | 34.834 |
| MVP M       | 18.96111 | 4.74231 | 3.99829 | 0.01515 | 0.05  | 1   | 3.42133   | 34.501 |
| MVP MP      | 12.61667 | 4.39052 | 2.87361 | 0.09939 | 0.05  | 0   | -1.77038  | 27.004 |

*Appendix Table 7.15: Statistical analysis for the histologically measured new bone with its related marrow spaces (area %)*

Descriptive statistics for the histologically measured new bone with its related marrow spaces (area %)

| Reconstructive gp. | N Analysis | Mean     | Standard Deviation | SE of Mean |
|--------------------|------------|----------|--------------------|------------|
| control            | 3          | 45.36169 | 17.80514           | 10.2798    |
| M                  | 3          | 32.05304 | 10.88549           | 6.28474    |
| MP                 | 4          | 39.57009 | 24.16643           | 12.08322   |
| MVP                | 4          | 49.36902 | 14.65252           | 7.32626    |

Homogeneity of Variance test: Levene's test (Absolute deviations)

|       | DF | Sum of Squares | Mean Square | F Value | Prob>F  |
|-------|----|----------------|-------------|---------|---------|
| Model | 3  | 190.16485      | 63.38828    | 0.72929 | 0.55761 |
| Error | 10 | 869.17334      | 86.91733    |         |         |

At the 0.05 level, the population variances are not significantly different.

One Way ANOVA for the histologically measured new bone and marrow areas at terminal samples

|       | DF | Sum of Squares | Mean Square | F Value | Prob>F  | R-square | $\eta^2$  | $\omega^2$ |
|-------|----|----------------|-------------|---------|---------|----------|-----------|------------|
| Model | 3  | 571.55654      | 190.51885   | 0.58313 | 0.63949 | 0.14889  | 0.1488922 | 0          |
| Error | 10 | 3267.17163     | 326.71716   |         |         |          |           |            |
| Total | 13 | 3838.72817     |             |         |         |          |           |            |

*Appendix Table 7.16: Statistical analysis for the histologically measured residual biomaterial with its related fibrovascular stroma (area %)*

Descriptive statistics for the histologically measured residual biomaterial with its related fibrovascular stroma (area %)

| Reconstructive gp. | N Analysis | Mean     | Standard Deviation | SE of Mean |
|--------------------|------------|----------|--------------------|------------|
| control            | 3          | 54.63831 | 17.80514           | 10.2798    |
| M                  | 3          | 67.94696 | 10.88549           | 6.28474    |
| MP                 | 4          | 60.42991 | 24.16643           | 12.08322   |
| MVP                | 4          | 50.63098 | 14.65252           | 7.32626    |

Homogeneity of Variance test: Levene's test (Absolute deviations)

|       | DF | Sum of Squares | Mean Square | F Value | Prob>F  |
|-------|----|----------------|-------------|---------|---------|
| Model | 3  | 190.16485      | 63.38828    | 0.72929 | 0.55761 |
| Error | 10 | 869.17334      | 86.91733    |         |         |

At the 0.05 level, the population variances are not significantly different.

One Way ANOVA for the histologically measured residual biomaterial and related fibrovascular stroma at terminal samples

|       | DF | Sum of Squares | Mean Square | F Value | Prob>F  | R-square | $\eta^2$  | $\omega^2$ |
|-------|----|----------------|-------------|---------|---------|----------|-----------|------------|
| Model | 3  | 571.55654      | 190.51885   | 0.58313 | 0.63949 | 0.14889  | 0.1488922 | 0          |
| Error | 10 | 3267.17163     | 326.71716   |         |         |          |           |            |
| Total | 13 | 3838.72817     |             |         |         |          |           |            |

## 8 References

Bankhead P, Loughrey MB, Fernández JA, Dombrowski Y, McArt DG, Dunne PD, McQuaid S, Gray RT, Murray LJ, Coleman HG et al. 2017. Qupath: Open source software for digital pathology image analysis. Scientific Reports. 7(1):16878.
